# Supplementary material for: Alkali-stable partially fluorinated poly(arylene ether) anion exchange membranes with a claw-type head for fuel cells
Source: Royal Society of Chemistry journal article supplement (doi:10.1039/c8ta03437k), 2018-01-01
Supplement: c8ta03437k1.pdf [file c8ta03437k1.pdf]

## *Supplementary Information*

### Alkali-stable partially-fluorinated poly(arylene ether) anion exchange membranes with claw-type head for fuel cells

Xiu Qin Wang, Chen Xiao Lin, Fang Hua Liu, Ling Li, Qian Yang, Qiu Gen Zhang, Ai Mei Zhu, Qing Lin Liu \*

*Fujian Provincial Key Laboratory of Theoretical and Computational Chemistry, Department of Chemical & Biochemical Engineering, The College of Chemistry and Chemical Engineering, Xiamen University, Xiamen 361005, P. R. China.*

\*Corresponding author:

Q.L. Liu, E-mail: qlliu@xmu.edu.cn, Tel: 86-592-2188072, Fax: 86-592-2184822.

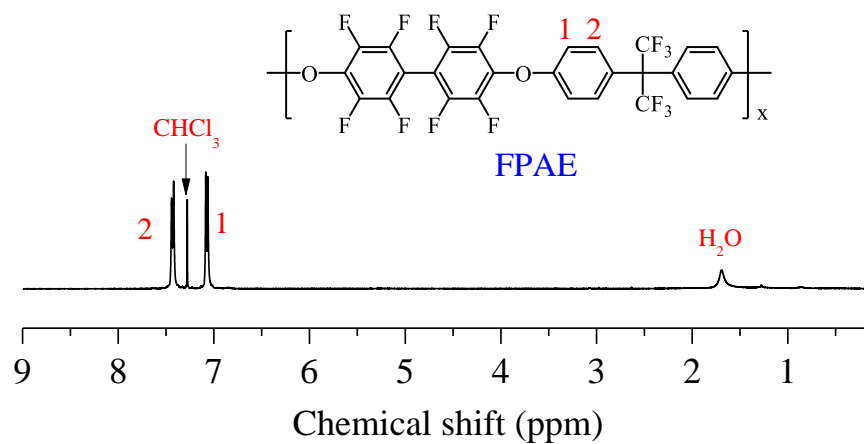

Fig. S1  $^1\text{H}$  NMR spectrum of FPAE.

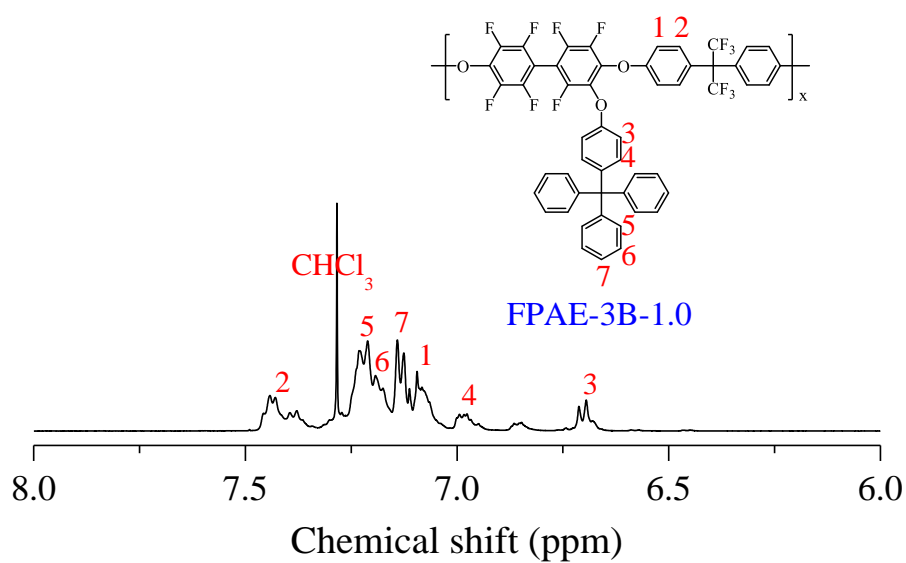

Fig. S2  $^1\text{H}$  NMR spectrum of FPAE-3B-1.0.

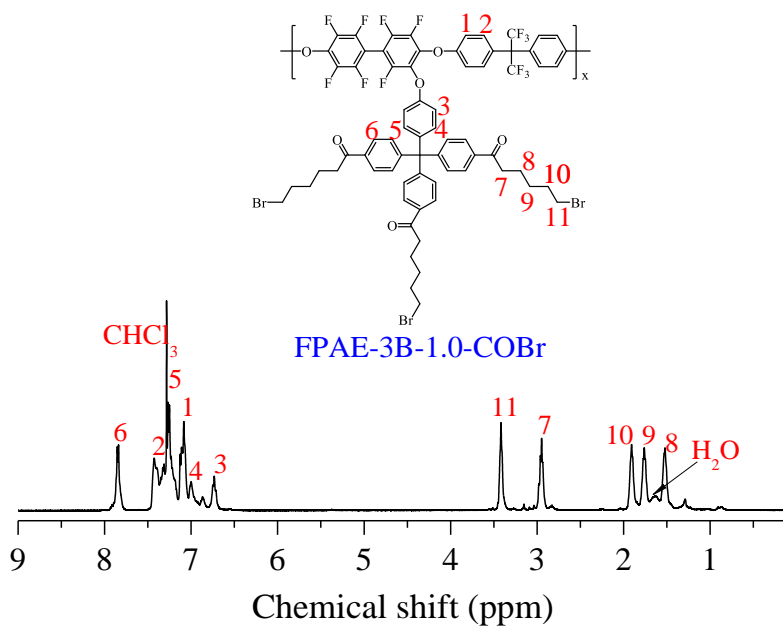

Fig. S3 <sup>1</sup>H NMR spectrum of FPAE-3B-1.0-COBr.

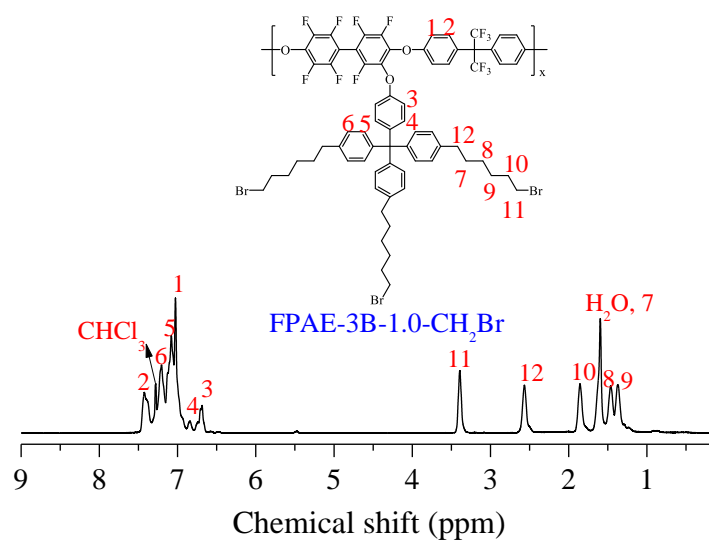

Fig. S4 <sup>1</sup>H NMR spectrum of FPAE-3B-1.0-CH<sub>2</sub>Br.

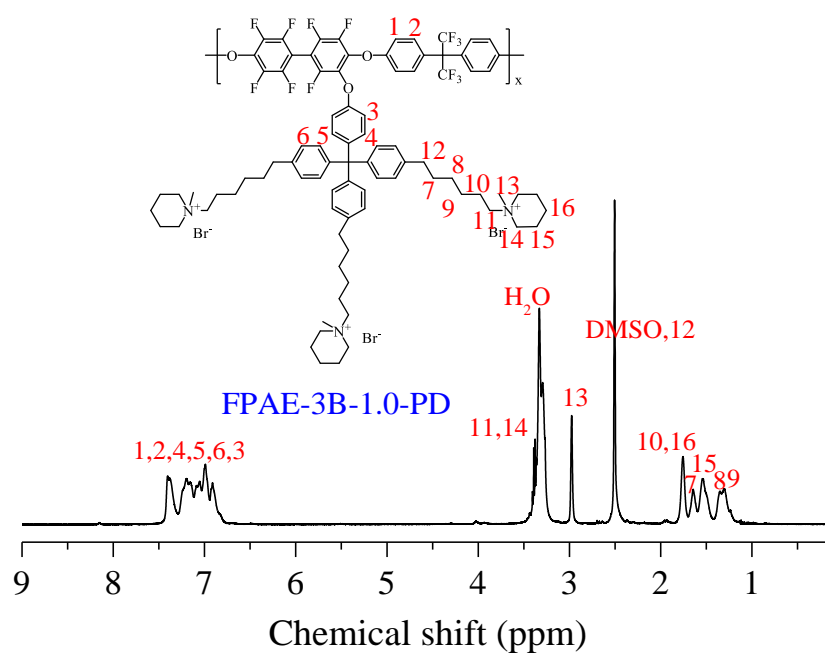

Fig. S5  $^1\text{H}$  NMR spectrum of FPAE-3B-1.0-PD.

Table S1 Mechanical properties of FPAE-3B-3.0-PD before and after alkaline stability test.

| FPAE-3B-3.0-PD | Tensile Strength (MPa) | Elongation at Break (%) |
|----------------|------------------------|-------------------------|
| Before         | 15.9 $\pm$ 1.1         | 18.2 $\pm$ 0.9          |
| After          | 15.6 $\pm$ 1.5         | 17.6 $\pm$ 1.3          |

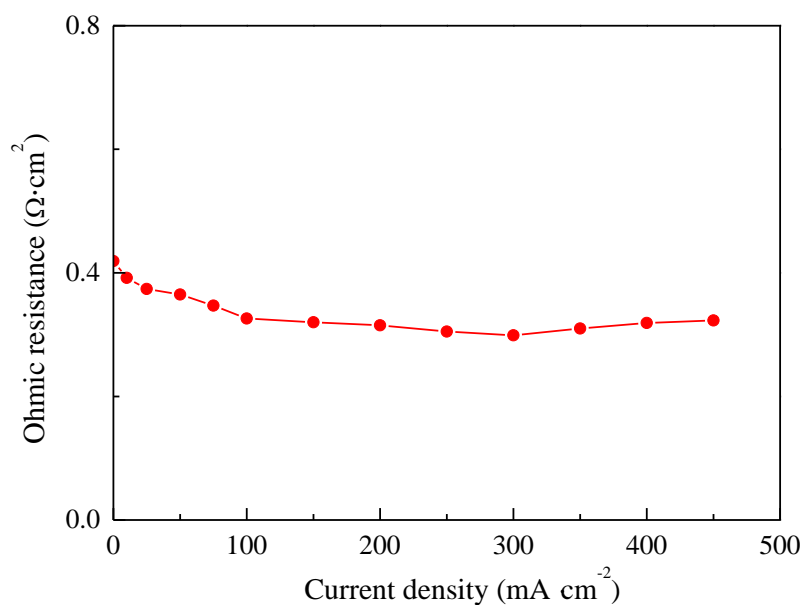

Fig. S6 Ohmic resistance of MEA using FPAE-3B-3.0-PD as the membrane at 60 °C.
